# Supplementary material for: Economic burden of severe asthma treatment: A real-life study
Source: PubMed Central journal article supplement — World Allergy Organ J. 2022 Jul 4;15(7):100662. doi: 10.1016/j.waojou.2022.100662 (PMC9260620; doi:10.1016/j.waojou.2022.100662), 2022-07-04
Supplement: mmc1.pdf [file mmc1.pdf]

Title: Economic burden of severe asthma treatment: a real-life study

Short title: Economic burden of severe asthma

Table S1. Weight and Omalizumab dosage per patient

| Patients | Weight (kg) | 2018            | 2019            |
|----------|-------------|-----------------|-----------------|
|          |             | Omalizumab (mg) | Omalizumab (mg) |
| 1        | 58.0        | 300             | 300             |
| 2        | 67.0        | 300             | 300             |
| 3        | 67.0        | 300             | 300             |
| 4        | 65.0        | 300             | 300             |
| 5        | 71.0        | 300             | 300             |
| 6        | 88.0        | 300             | 300             |
| 7        | 72.0        | 300             | 300             |
| 8        | 69.5        | 300             | 300             |
| 9        | 78.8        | 300             | 300             |
| 10       | 71.0        | 300             | 300             |
| 11       | 90.0        | 450             | 450             |
| 12       | 57.0        | 300             | 300             |
| 13       | 54.0        | 300             | 300             |
| 14       | 79.8        | 300             | 300             |
| 15       | 113.0       | 150             | 300             |
| 16       | 61.0        | 300             | 300             |
| 17       | 77.0        | 300             | 300             |
| 18       | 56.0        | 300             | 300             |
| 19       | 106.0       | 300             | 300             |
| 20       | 69.5        | 300             | 300             |
| 21       | 101.0       | 300             | 300             |
| 22       | 80.0        | 150             | 150             |
| 23       | 59.0        | 300             | 300             |
| 24       | 62.0        | 300             | 300             |
| 25       | 60.0        | 300             | 300             |
| 26       | 75.0        | 300             | 300             |
| 27       | 42.0        | 300             | 300             |
| 28       | 75.0        | 300             | 300             |
| 29       | 75.0        | 300             | 300             |
| 30       | 95.0        | 300             | 300             |

Table S1 continued.

| Patients | Weight (kg) | 2018            | 2019 |
|----------|-------------|-----------------|------|
|          |             | Omalizumab (mg) |      |
| 31       | 76.5        | 300             | 300  |
| 32       | 65.0        | 300             | 300  |
| 33       | 80.0        | 300             | 300  |
| 34       | 61.0        | 300             | 300  |
| 35       | 82.0        | 300             | 300  |
| 36       | 91.5        | 300             | 300  |
| 37       | 69.0        | 300             | 300  |
| 38       | 70.0        | 300             | 300  |
| 39       | 69.0        | 300             | 300  |
| 40       | 88.0        | 300             | 300  |
| 41       | 82.0        | 300             | 300  |
| 42       | 72.0        | 300             | 300  |
| 43       | 77.0        | 300             | 300  |
| 44       | 66.0        | 300             | 300  |
| 45       | 68.0        | 300             | 300  |
| 46       | 84.0        | 300             | 300  |
| 47       | 48.0        | 300             | 300  |
| 48       | 75.5        | 300             | 300  |
| 49       | 61.0        | 300             | 300  |
| 50       | 78.0        | 450             | 450  |
| 51       | 58.0        | 450             | 450  |
| 52       | 79.0        | 150             | 150  |
| 53       | 54.0        | 300             | 300  |
| 54       | 88.0        | 300             | 300  |
| 55       | 60.0        | 300             | 300  |
| 56       | 60.0        | 150             | 150  |
| 57       | 52.5        | 150             | 150  |
| 58       | 72.0        | 300             | 300  |
| 59       | 53.0        | 450             | 450  |
| 60       | 42.0        | 300             | 300  |
